# Supplementary material
Source: HighWire-hosted journal article supplement (https://jitc.bmj.com/content/9/5/e002274)

Figure S2

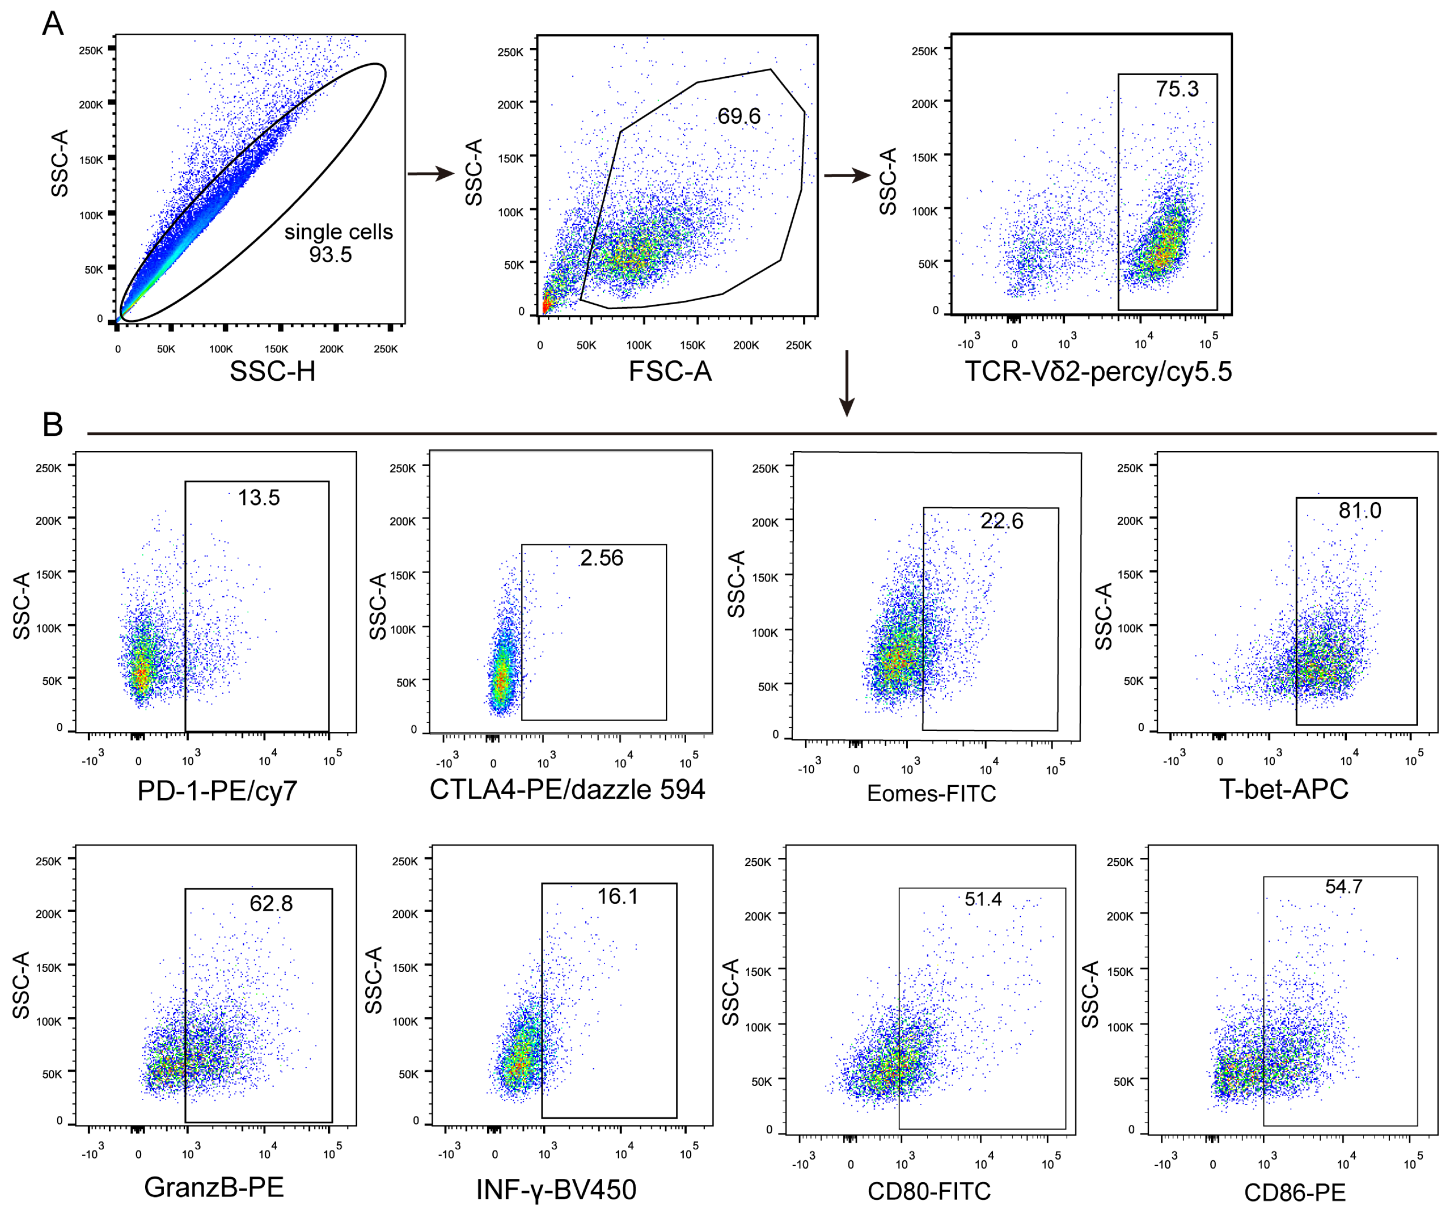

Supplement: inline-supplementary-material-3 [file inline-supplementary-material-3.pdf]

Figure S3

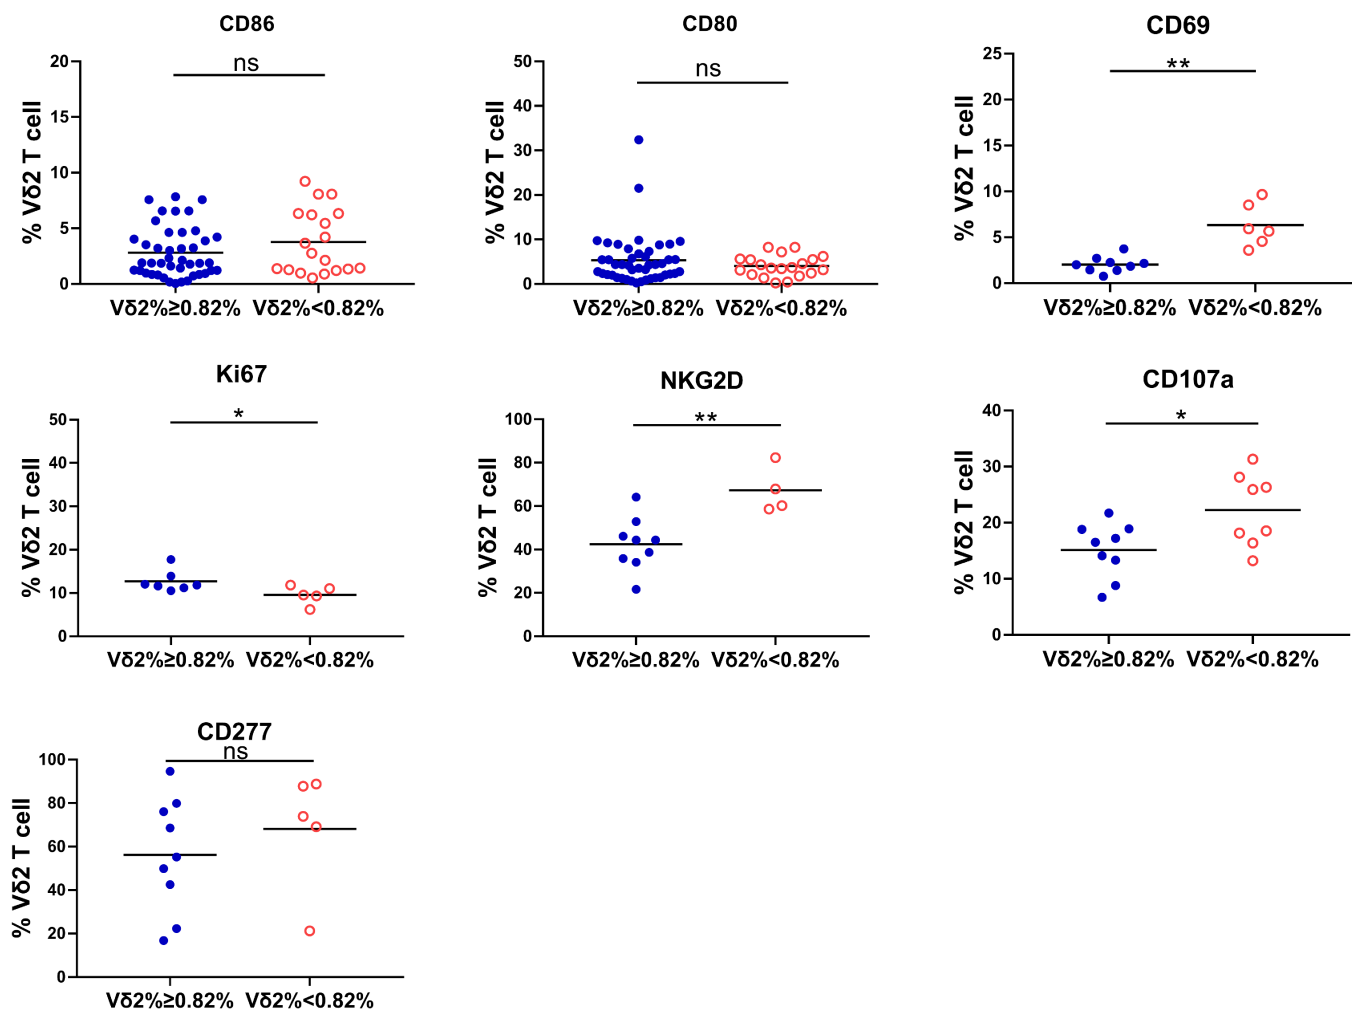

Supplement: inline-supplementary-material-4 [file inline-supplementary-material-4.pdf]

## Figure S4

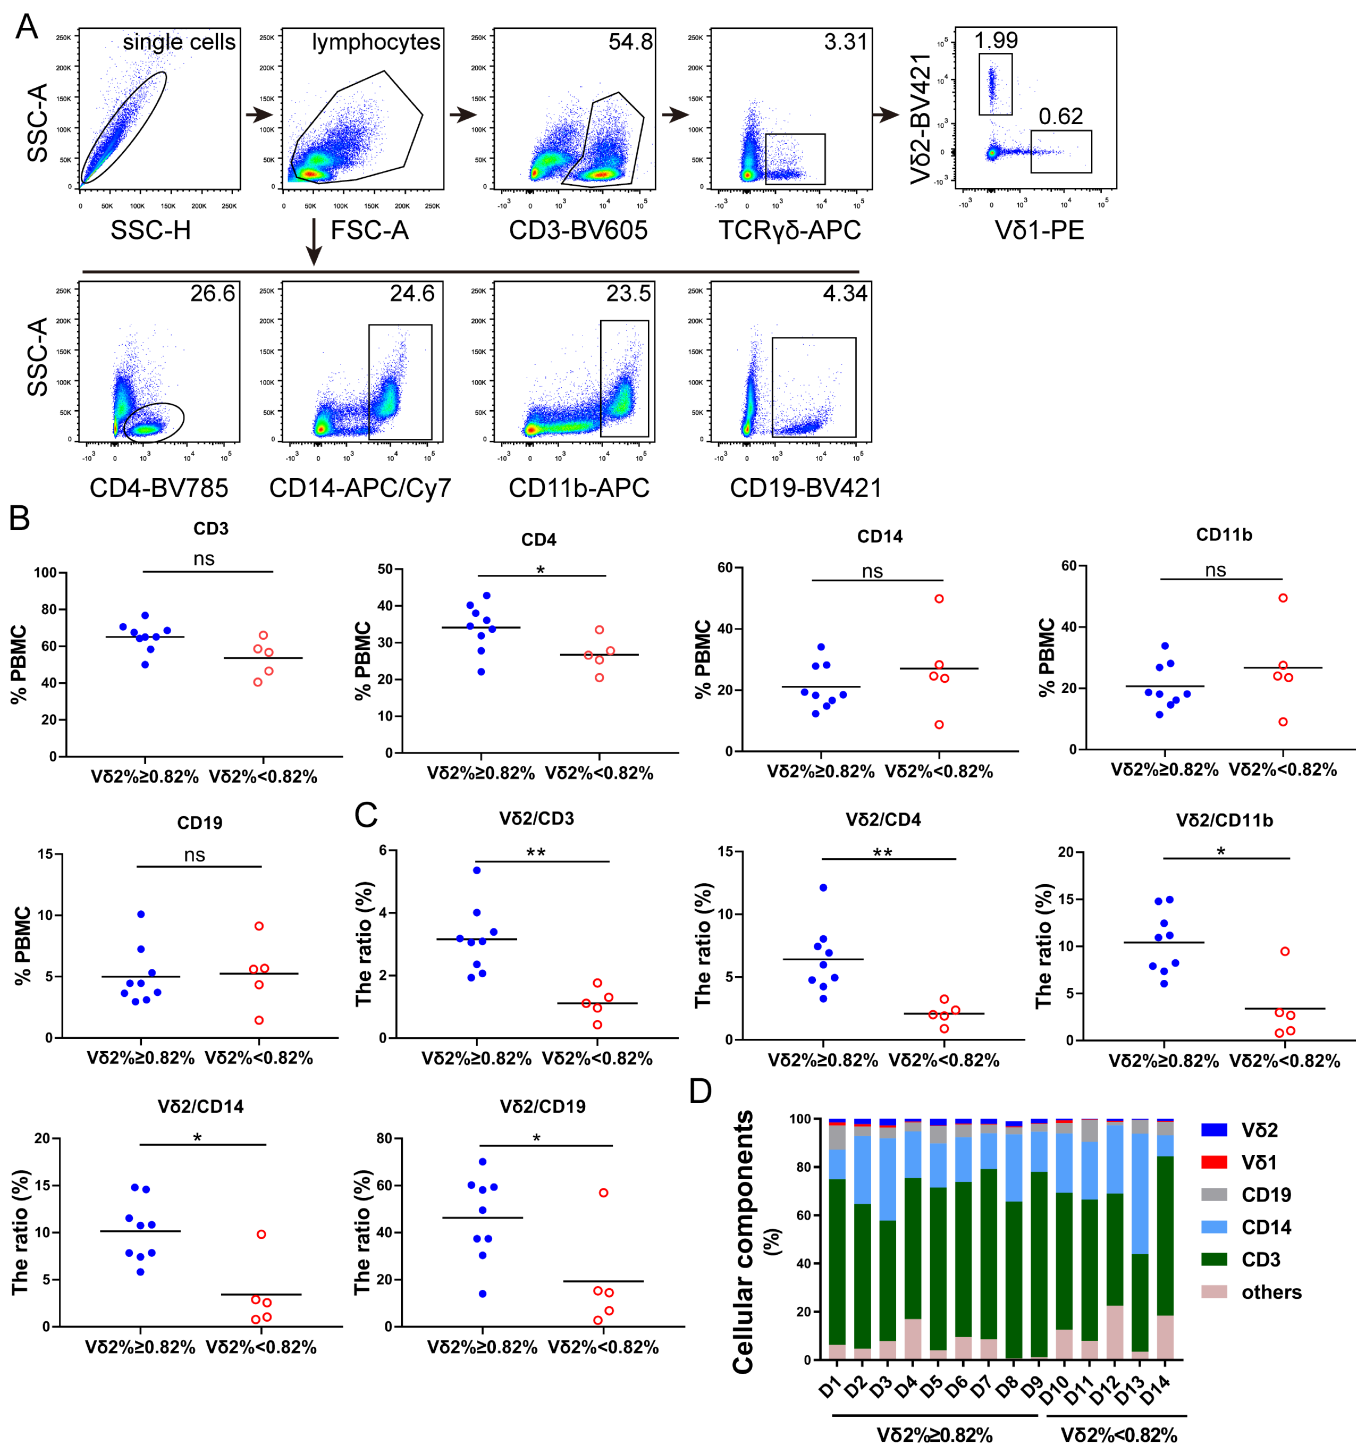

Supplement: inline-supplementary-material-5 [file inline-supplementary-material-5.pdf]

Figure S5

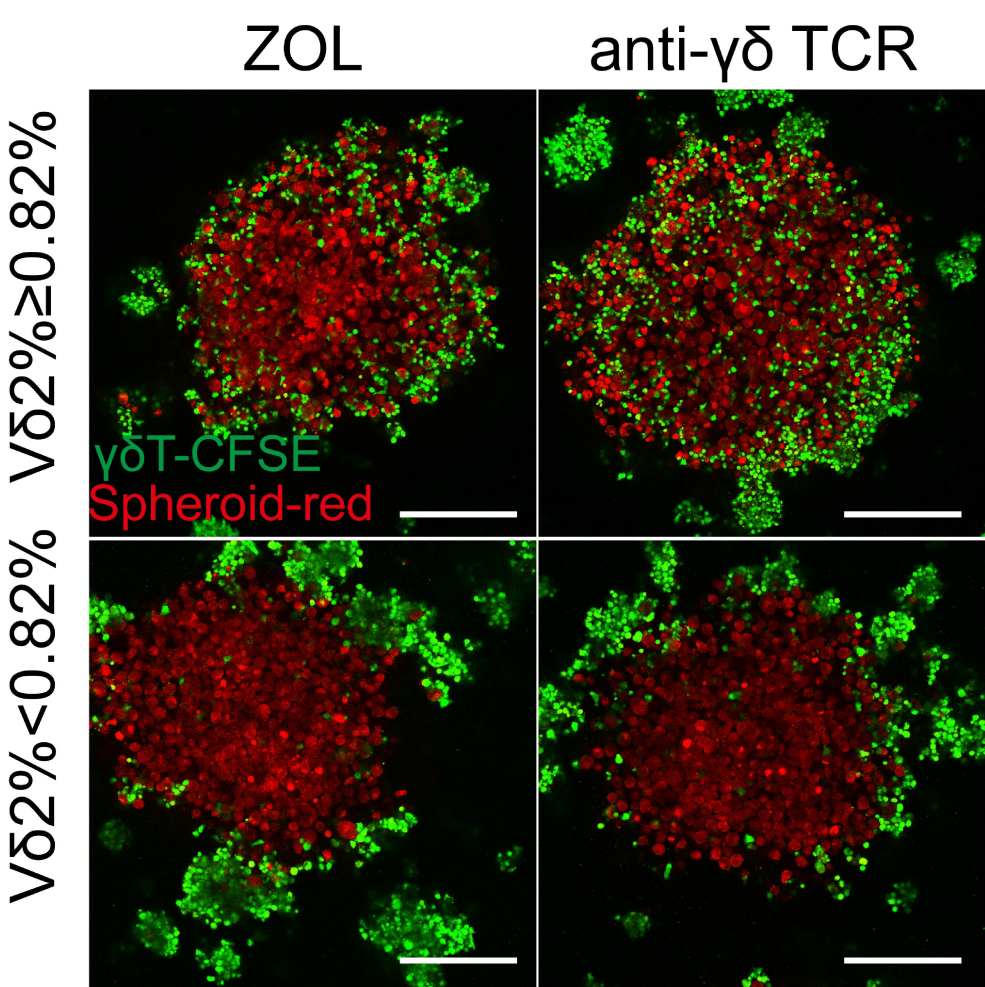

Supplement: inline-supplementary-material-6 [file inline-supplementary-material-6.pdf]

Figure S6

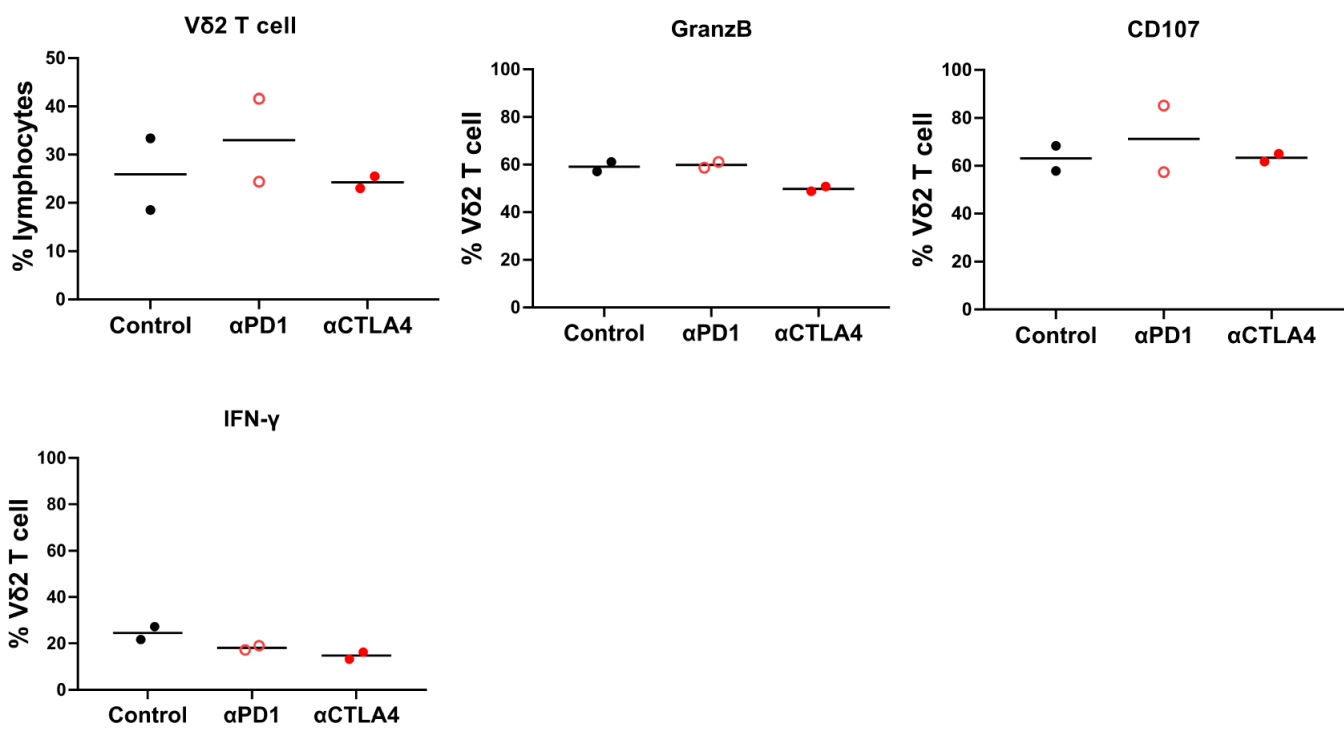

Supplement: inline-supplementary-material-7 [file inline-supplementary-material-7.pdf]

## Figure S7

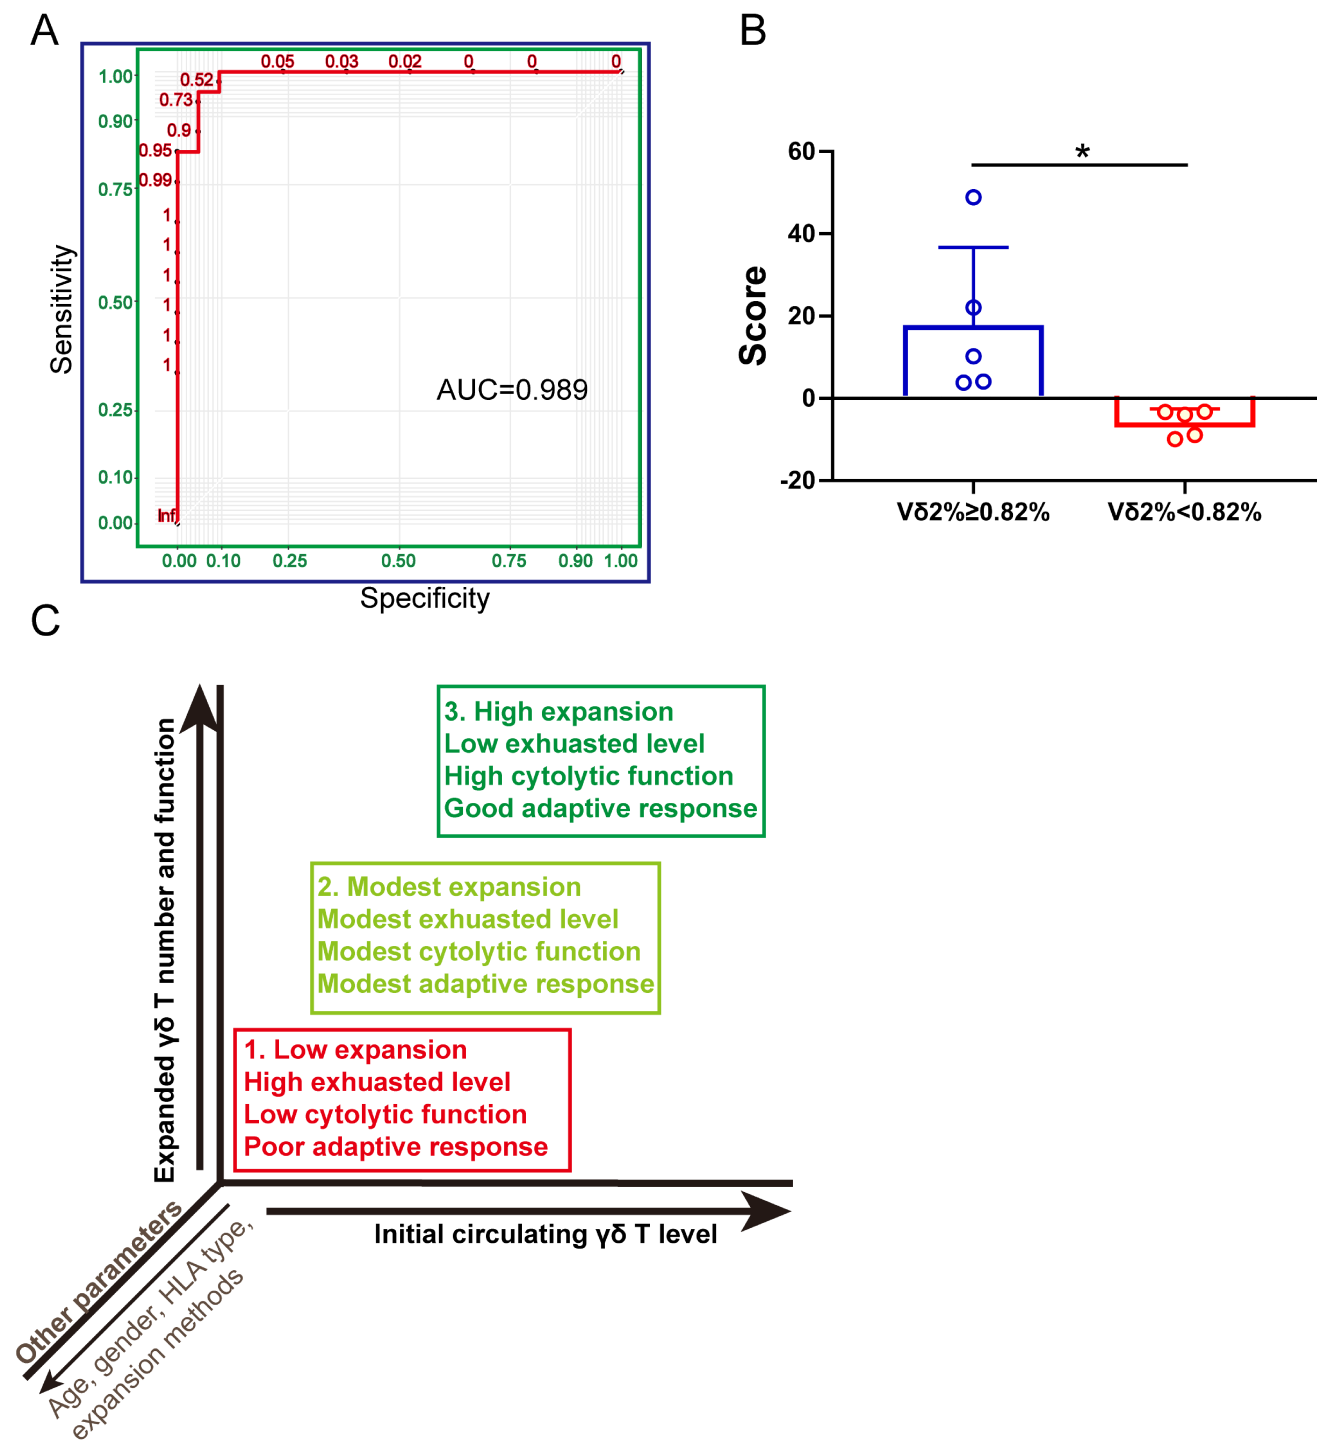

Supplement: inline-supplementary-material-8 [file inline-supplementary-material-8.pdf]
